1 ***Bacillus licheniformis* global nitrogen homeostatic regulator TnrA is a**  
2 **direct repressor of *pgsBCAA* transcription in Poly- $\gamma$ -glutamic acid**  
3 **synthesis**

4 **Running Title: TnrA represses *pgsB* transcription in *B. licheniformis***

5

6 Dongbo Cai, Yaozhong Chen, Shiyi Wang, Fei Mo, Xin Ma, Shouwen Chen \*

7 *Environmental Microbial Technology Center of Hubei Province, Hubei*

8 *Collaborative Innovation Center for Green Transformation of Bio-Resources, College*

9 *of Life Sciences, Hubei University, Wuhan 430062, PR China*

10

11 \*Corresponding author: Prof. Shouwen Chen

12 Tel./fax.: +86 027-88666081.

13 *E-mail address:* [mel212@126.com](mailto:mel212@126.com) (S. Chen).

14 *Postal address:* 368 Youyi Avenue, Wuchang District, Wuhan 430062, Hubei, PR

15 China

16

17

18 **Abstract** Poly- $\gamma$ -glutamic acid ( $\gamma$ -PGA) is a multifunctional and naturally occurring  
19 biopolymer made from D- and L-glutamate as monomers, which is mainly produced  
20 by *Bacillus*. Few reports have been focused on the regulation network of  $\gamma$ -PGA  
21 synthesis in recent years. In this study, we have demonstrated that *Bacillus*  
22 *licheniformis* global nitrogen homeostatic regulator TnrA is a direct repressor of  
23  $\gamma$ -PGA synthase PgsBCAA in  $\gamma$ -PGA synthesis. First, our results confirmed that TnrA  
24 repressed  $\gamma$ -PGA synthesis, deficiency of *tnrA* led to a 22.03% increase of  $\gamma$ -PGA  
25 production, and the  $\gamma$ -PGA yield was decreased by 19.02% in the TnrA  
26 overexpression strain. Transcriptional level assay illustrated that the  $\gamma$ -PGA synthase  
27 gene cluster *pgsBCAA* transcriptional level were increased in the *tnrA* deficient strain  
28 WX $\Delta$ *tnrA*, indicating that  $\gamma$ -PGA synthase PgsBCAA was negatively regulated by  
29 TnrA. Furthermore, electrophoretic mobility shift assay (EMSA) and enzyme  
30 expression assays confirmed that TnrA directly repressed *pgsBCAA* expression by  
31 binding to *pgsBCAA* promoter, and the TnrA-binding site  
32 “CGTCGTCTTCTGTTACA” in the *pgsBCAA* promoter was identified by sequence  
33 and software analysis. Finally, computer analysis confirmed that the transcription  
34 regulations of  $\gamma$ -PGA synthase PgsBCAA by TnrA were highly conserved in other  
35 well-studied *Bacillus* species (*B. licheniformis*, *Bacillus subtilis* and *Bacillus*  
36 *amyloliquefaciens*). Collectively, our results implied that TnrA was a direct repressor  
37 for *pgsBCAA* expression in  $\gamma$ -PGA synthesis, and this research provided a novel  
38 regulatory mechanism underlying  $\gamma$ -PGA synthesis, and a new approach that  
39 deficiency of *tnrA* increases  $\gamma$ -PGA production.

40 **Importance**

41  $\gamma$ -PGA is an important biopolymer with many applications, which is mainly  
42 produced by *Bacillus* species. Glutamic acid is the precursor for  $\gamma$ -PGA synthesis,  
43 which is catalyzed by the  $\gamma$ -PGA synthase PgsBCAA. Previously, the expression of  
44 PgsBCAA was reported to be regulated by ComA-ComP and DegS-DegU, DegQ and  
45 SwrA systems, however, few researches were focused on the regulation network of  
46  $\gamma$ -PGA synthesis in recent years. In our research, the  $\gamma$ -PGA synthase PgsBCAA was  
47 confirmed to be negatively regulated by the nitrogen metabolism regulator TnrA, and  
48 the TnrA binding site in the *pgsBCAA* promoter was identified in *B. licheniformis*  
49 WX-02. Furthermore, computer analysis implied that TnrA-mediated regulation effect  
50 on *pgsBCAA* expression was highly conserved in *Bacillus*. Collectively, our research  
51 provided a novel regulatory mechanism underlying  $\gamma$ -PGA synthesis, and a new  
52 approach that deficiency of *tnrA* increases  $\gamma$ -PGA production.

53

54 **Keywords:** *Bacillus licheniformis*; Poly- $\gamma$ -glutamic acid; nitrogen regulator TnrA;  
55 transcription regulatory;  $\gamma$ -PGA synthase PgsBCAA

56

57

## 58 Introduction

59 Poly- $\gamma$ -glutamic acid ( $\gamma$ -PGA) is a multifunctional and naturally occurring  
60 biopolymer made from D- and L-glutamate as monomers (1). Due to its own the  
61 features of cation chelating, hygroscopicity, water-solubility, non-toxicity and  
62 biodegradability,  $\gamma$ -PGA has been used as various materials such as drug carriers,  
63 food preservatives, metal ion chelating agents, highly water absorbable hydrogels and  
64 fertilizer accelerators, and applied in the areas of medicine, food, water treatment,  
65 cosmetics and agriculture etc (2, 3).

66 Generally, *Bacillus* species were regarded as the efficient  $\gamma$ -PGA producers, and  
67 the precursor, *in vivo* glutamic acid, was applied for  $\gamma$ -PGA biosynthesis under the  
68 catalysis of  $\gamma$ -PGA synthase complex PgsBCAA (2). Among this gene cluster, gene  
69 *pgsB* acts as the main function role of  $\gamma$ -PGA synthase, whereas *pgsC* owns the  
70 function of  $\gamma$ -PGA secretion, and *pgsAA* is necessary for the next monomer addition  
71 and transportation of  $\gamma$ -PGA through the cell membrane (4). Previously, the  $\gamma$ -PGA  
72 synthesis was reported to be regulated by the two-component systems ComA-ComP  
73 and DegS-DegU, DegQ and SwrA systems (5). Among them, ComA-ComP and  
74 DegS-DegU, DegQ were involved in the quorum sensing, osmolarity, phase variation  
75 signals, while SwrA appears to act at the post-transcriptional level. Based on the  
76 previous researches, the regulation of  $\gamma$ -PGA synthesis by DegQ was well  
77 investigated, and the  $\gamma$ -PGA synthesis capability was abolished in the *degQ* mutant  
78 strain. Phosphorylated DegU (DegU-P) and SwrA up-regulated the expression level  
79 of *pgs* operon for  $\gamma$ -PGA synthesis (6, 7), and no more in-depth study was conducted

80 to resolve this mechanism. Recent years, several researches were focused on the  
81 improvement of  $\gamma$ -PGA production by metabolic engineering strategies (8-10),  
82 however, few works were conducted to elaborate the regulation network of  $\gamma$ -PGA  
83 synthesis, thereby, it was unclear that whether the  $\gamma$ -PGA synthase PgsBCAA was  
84 regulated by other regulators.

85         The global nitrogen homeostatic regulator TnrA is known as a member of MerR  
86 family transcriptional factor, and it could both activate and repress the expression of  
87 many genes under nitrogen limited condition (11). Generally, TnrA up-regulated the  
88 expression levels of genes encoding ammonium transport (*amtB-glnK*) (12), nitrate  
89 assimilation (*nasAB*) (13), nitrite assimilatory enzymes (*nasDEF*) etc (14), and also  
90 exerted negative effects on the expression of *glnRA* (encoding for glutamine synthase)  
91 (15), *gltAB* (encoding for glutamic acid synthase) (16), *ilv-leu* (encoding for  
92 branched-chain amino acids synthase) (17), *degU* (encoding for two-component  
93 system DegS-DegU) etc (18). Previously, the chromatin immunoprecipitation coupled  
94 with hybridization to DNA tiling arrays (ChIP-on-chip) was applied to identify the  
95 TnrA binding sites at the genome scale of *B. subtilis*, and their results provided that  
96 TnrA binds reproducibly to 42 regions. Among them, 35 TnrA primary regulons were  
97 confirmed by real time in vivo transcriptional profiling using firefly luciferase. In  
98 their research, a predicted TnrA box has been implied in the promoter region of  
99  $\gamma$ -PGA synthase gene *pgsB* (19), however, no in-depth research was conducted to  
100 analyze the relationship between TnrA and *pgsBCAA* expression.

101         *Bacillus licheniformis* WX-02 was proven as an efficient  $\gamma$ -PGA producer (20),

102 and our previous research found that the genes related to glutamic acid synthesis were  
103 activated by 6% NaCl addition (21), and the glutamic acid synthesis capabilities were  
104 also improved by the physicochemical stresses such as heat, osmotic and alkaline etc  
105 (22-24). Furthermore, several metabolic engineering strategies have been conducted  
106 to improve the  $\gamma$ -PGA production (8, 25, 26). In this study, we demonstrated that  
107 *Bacillus licheniformis* global nitrogen homeostatic regulator TnrA is a direct repressor  
108 of *pgsBCAA* transcription in  $\gamma$ -PGA synthesis, and the TnrA-mediated regulation  
109 effect on *pgsBCAA* expression was highly conserved in *Bacillus*.

110

## 111 **Results**

### 112 **Deficiency of *tnrA* increased $\gamma$ -PGA production**

113 TnrA is known as a global nitrogen regulator in *B. subtilis*. In order to test the  
114 function role of TnrA on  $\gamma$ -PGA production in *B. licheniformis*, the *tnrA* deficient and  
115 overexpression strains were constructed based on *B. licheniformis* WX-02, and the  
116 recombinant strains were named as WX $\Delta$ *tnrA* and WX/pHY-*tnrA*, respectively. Then,  
117 these recombinants, as well as the control strains WX-02 and WX/pHY300, were  
118 cultivated in the  $\gamma$ -PGA production medium, and the  $\gamma$ -PGA yields at the end of  
119 fermentation (32 h) were measured to evaluate the effects of *tnrA* deficiency and  
120 overexpression on the  $\gamma$ -PGA production. Based on our results of **Fig. 1**, WX $\Delta$ *tnrA*  
121 produced 38.37 g/L  $\gamma$ -PGA, increased by 22.03% compared with that of WX-02  
122 (31.45 g/L), indicating that deficiency of *tnrA* improved  $\gamma$ -PGA production.  
123 Meanwhile, overexpression of TnrA led to a 19.02% decrease of  $\gamma$ -PGA yield,

124 compared to WX/pHY300.

125 Furthermore, the  $\gamma$ -PGA yields, cell biomass, residue concentrations of glucose  
126 and glutamic acid of these strains were measured during  $\gamma$ -PGA production. Our  
127 results implied that the  $\gamma$ -PGA yields of WX $\Delta$ tnrA were higher than those of WX-02  
128 throughout the whole fermentation process, and the maximum  $\gamma$ -PGA yield was  
129 increased by 22.03%. Glucose and glutamic acid consumption rates of WX $\Delta$ tnrA  
130 were 9.13% and 11.34% higher than those of WX-02, respectively. Additionally,  
131 since the deficiency of *tnrA* affects the expression levels of nitrogen utilization genes  
132 (19, 27), which led to the low cell growth of WX $\Delta$ tnrA during the  $\gamma$ -PGA  
133 fermentation. The specific  $\gamma$ -PGA yield of WX $\Delta$ tnrA was 6.11g/g<sub>DCW</sub>, increased by  
134 42% compared with that of WX-02 (4.31g/g<sub>DCW</sub>). Meanwhile, overexpression of *tnrA*  
135 decreased the  $\gamma$ -PGA production, as well as the glucose and glutamic acid  
136 consumption rates, and the cell biomass increased obviously in the *tnrA*  
137 overexpression strain (**Fig. 2**). Collectively, our results demonstrated that the nitrogen  
138 regulator TnrA repressed the synthesis of  $\gamma$ -PGA, and deficiency of *tnrA* increased  
139  $\gamma$ -PGA yield.

140

141 **The transcriptional levels of  $\gamma$ -PGA synthase genes *pgsBCAA* were increased in**  
142 **the *tnrA* deficient strain**

143 Then, the transcriptional level of genes involved in glucose metabolism and  
144  $\gamma$ -PGA biosynthesis were determined during  $\gamma$ -PGA production. As shown in **Fig. 3**,  
145 no *tnrA* transcriptional level was determined in WX $\Delta$ tnrA, indicating that *tnrA* was

146 deleted successfully. The transcriptional levels of  $\gamma$ -PGA synthesis genes *pgsB*, *pgsC*  
147 and *pgsAA* were all increased in WX $\Delta$ *tnrA* (5.53-fold, 4.64-fold and 4.08-fold,  
148 respectively), and the transcription levels of their regulator genes, *degU*, was  
149 increased by 1.68-fold in the *tnrA* deficient strain. The glutamate synthase gene *gltA*  
150 was increased by 2.56-fold in WX $\Delta$ *tnrA*. Moreover, the transcriptional levels of  
151 glucose-6-phosphate isomerase gene *pgi* and glyceraldehyde-3-phosphate  
152 dehydrogenase gene *gapA* in the glycolytic pathway were increased obviously, as well  
153 as the citrate synthase gene *citB* and isocitrate dehydrogenase gene *icd* in tricarboxylic  
154 acid (TCA) cycle. The glucose 6-phosphate dehydrogenase gene *zwf* in pentose  
155 phosphate pathway showed no significant changes in *tnrA* deficient strain.  
156 Furthermore, the genes, *alsS* and *alsD*, which responsible for the synthesis of main  
157 byproducts acetoin and 2,3-butandieol, were all decreased in WX $\Delta$ *tnrA*, indicating  
158 that the deficiency of *tnrA* repressed the overflow metabolism, which were beneficial  
159 for  $\gamma$ -PGA synthesis.

160

### 161 **Identification of TnrA binding sites in the *pgsBCAA* promoter**

162 Previous research has implied that there might be a predicted TnrA box in the  
163 *pgsB* promoter of *B. subtilis* (19). To verify whether TnrA regulated the *pgsBCAA*  
164 promoter directly or not in *B. licheniformis* WX-02, electrophoretic mobility shift  
165 assays (EMSAs) were performed. We expressed His<sub>6</sub>-tagged TnrA in *E. coli*  
166 BL21(DE3) and purified, and the SDS-PAGE results in **Fig. 4A** demonstrated that the  
167 TnrA protein was induced and purified successfully. Then, the DNA probes of



168 *pgsBCAA* promoter (form -300 to +50) were amplified, and the purified DNA probes  
169 were incubated with the purified His<sub>6</sub>-tagged TnrA according to the instruction  
170 manual of EMSA kit. As shown in **Fig. 4B**, a TnrA-P<sub>*pgsB*</sub> complex was formed in a  
171 concentration-dependent manner, indicating that TnrA could bind to the promoter of  
172 *pgsBCAA*.

173 Previously, the TnrA box was proven to be a 17-bp interrupted, inverted repeat  
174 sequence “TGTNANAWWTNTNACA” in *B. subtilis* (28). In this research, based  
175 on the conserved sequence of TnrA box and MEME software screening, the suspected  
176 TnrA binding site in *pgsBCAA* promoter, “CGTCGTCTTCTGTTACA”, was screened,  
177 which is outside of the “-10” and “-35” regions of *pgsBCAA* promoter (**Fig. 4C**). Then,  
178 the sequence of predicted TnrA box was further deleted in the *pgsBCAA* promoter,  
179 and formed the promoter P<sub>*pgsB*</sub>. Our results confirmed that there was no TnrA-P<sub>*pgsB*</sub>  
180 complex formed in the EMSA assay, even though 200 ng TnrA was applied (**Fig. 4B**).  
181 Thus, it was confirmed that TnrA directly band the *pgsBCAA* promoter, and the TnrA  
182 box “CGTCGTCTTCTGTTACA” in *pgsBCAA* promoter has been identified in *B.*  
183 *licheniformis* WX-02.

184

### 185 ***pgsBCAA* promoter is negatively regulated by TnrA**

186 Furthermore, to investigate whether *pgsBCAA* was negatively or positively  
187 regulated by TnrA *in vivo*, the nattokinase expression assay was performed. Firstly, to  
188 exclude the interference of regulator DegU, which has been confirmed as the direct  
189 positive activator of *pgsBCAA* in the previous research (6, 7), we deleted gene *degU*

190 in WX-02 and WX $\Delta$ *tnrA*, and resulting in the mutant strains WX $\Delta$ degU and  
191 WX $\Delta$ *tnrA* $\Delta$ degU. Then, the nattokinase expression vector mediated by P<sub>*pgsB*</sub> were  
192 constructed, and electro-transferred into WX $\Delta$ degU and WX $\Delta$ *tnrA* $\Delta$ degU,  
193 respectively. Based on our results of **Fig. 5**, the nattokinase activities of  
194 WX $\Delta$ *tnrA* $\Delta$ degU were higher those of WX $\Delta$ degU under the condition of P<sub>*pgsB*</sub>  
195 promoter, and the maximum activity of WX $\Delta$ *tnrA* $\Delta$ degU was 26.39 FU/mL,  
196 increased by 45.19% compared with that of WX $\Delta$ degU (18.18 FU/mL). Also, the  
197 specific nattokinase activity of WX $\Delta$ *tnrA* $\Delta$ degU/pPgsBSacCNK was 2.57 FU/OD<sub>600</sub>,  
198 increased by 91.66% compared to WX $\Delta$ degU/pPgsBSacCNK (1.34 FU/OD<sub>600</sub>) (**Fig.**  
199 **5A**). Thus, these results indicated that deficiency of *tnrA* might improve the  
200 expression of *pgsBCAA* promoter, which led to the improvement of nattokinase  
201 activity in the WX $\Delta$ *tnrA* $\Delta$ degU/pPgsBSacCNK. Additionally, to exclude the  
202 interference of *tnrA* deficiency on the cell growth, which might affect nattokinase  
203 production, the nattokinase vector mediated by P43 promoter was applied, and  
204 electro-transferred into WX $\Delta$ degU and WX $\Delta$ *tnrA* $\Delta$ degU, respectively. Our results  
205 implied that the nattokinase activities produced by WX $\Delta$ *tnrA* $\Delta$ degU/pP43SacCNK  
206 were lower than those of WX $\Delta$ degU/pP43SacCNK throughout the fermentation  
207 process (**Fig. 5B**), and this might due to that deletion of *tnrA* led to the reduction of  
208 cell growth, which further influence nattokinase production (27). Collectively, these  
209 above results illustrated that TnrA negatively regulated the transcription of *pgsBCAA*,  
210 and the nattokinase activity mediated by P<sub>*pgsB*</sub> was improved in the *tnrA* deficient  
211 strain.

212 **The transcriptional regulation of *pgsBCAA* by TnrA is highly conserved in**  
213 ***Bacillus***

214 Finally, we investigated whether TnrA directly regulate the transcription of  
215  $\gamma$ -PGA synthase PgsBCAA or not in other *Bacillus* species. We screened the  $\gamma$ -PGA  
216 synthase gene cluster *pgsBCAA* in three well-studied *Bacillus* species (*B.*  
217 *licheniformis*, *B. subtilis*, *B. amyloliquefaciens*) according to the genome annotation  
218 from NCBI database, and searched the TnrA binding motif in their promoters regions.  
219 Sequence and software analyses indicated that TnrA binding sites were located in the  
220 *pgsBCAA* promoters of various *Bacillus* species: 14/15 *B. licheniformis*, 75/76 *B.*  
221 *subtilis*, 21/22 *B. amyloliquefaciens*. Meanwhile, the TnrA boxes were predicted in  
222 the corresponding promoters, which all located outside of the “-10” and “-35” regions  
223 of *pgsBCAA* promoters (**Table 3**). Thus, these results suggested that  $\gamma$ -PGA synthase  
224 PgsBCAA regulated by nitrogen regulator TnrA was highly conserved in *Bacillus*.

225

226 **Discussion**

227  $\gamma$ -PGA is an important biopolymer with many applications (29). Recently,  
228 several researches have been focused on the strategies of metabolic engineering to  
229 improve  $\gamma$ -PGA production, including eliminating the byproduct synthesis pathways,  
230 strengthening the  $\gamma$ -PGA pathways, manipulating ATP supply and NADPH  
231 generation (8, 10, 25, 30). However, the regulation network of  $\gamma$ -PGA synthesis has  
232 not been well analyzed, besides the regulators ComA~ComP, DegS~U, DegQ and  
233 SwrA (**Fig. 6**). In this study, it was confirmed that the nitrogen regulator TnrA was a

234 directly repressor of  $\gamma$ -PGA synthase PgsBCAA, and deficiency of *tnrA* led to a 22.03%  
235 increase of  $\gamma$ -PGA yield.

236  $\gamma$ -PGA was mainly produced by *Bacillus* species. *In vivo* glutamic acid is served  
237 as the precursor for  $\gamma$ -PGA synthesis, and nitrate addition could strengthen  $\gamma$ -PGA  
238 synthesis by our previous research, and ammonium salt was also acted as the  
239 important resource for  $\gamma$ -PGA synthesis (24, 31). Thus, nitrogen metabolism played  
240 an important role in  $\gamma$ -PGA synthesis. Since TnrA is a global nitrogen metabolism  
241 regulator in *Bacillus*, which acted both as the activator or repressor for nitrogen  
242 metabolism genes (11), thus, the regulator TnrA might also affect  $\gamma$ -PGA synthesis.  
243 Based on the previous research, a suspected TnrA box was predicted in the *pgsB*  
244 promoter in *B. subtilis* by Chip-on-chip (19), and our research confirmed that the  
245  $\gamma$ -PGA synthase complex PgsBCAA were directly regulated by the nitrogen regulator  
246 TnrA, and the related genes (*pgsB*, *pgsC* and *pgsAA*) transcriptional levels were all  
247 increased obviously in the *tnrA* deficient strain, which led to the improvement of  
248  $\gamma$ -PGA yield. In addition, TnrA was also proven as the repressor of the genes *gltAB*  
249 and *degU* (16), which were responsible for glutamate synthase and regulation of  
250  $\gamma$ -PGA synthase in *Bacillus*. Based on our results, *gltA* and *degU* transcriptional level  
251 were increased obviously in the *tnrA* deficient strain, and this might be another reason  
252 that the  $\gamma$ -PGA yield produced by WX $\Delta$ *tnrA* was higher than that of WX-02, and the  
253 proposed regulatory network of TnrA in  $\gamma$ -PGA biosynthesis in *B. licheniformis*  
254 WX-02 was provided in **Fig. 6**. Additionally, the nitrogen regulators GlnR and CodY  
255 acted as the similar features compared to TnrA, however, whether these regulators

256 affect  $\gamma$ -PGA synthesis or not is still unknown recent now.

257 Previously, the  $\gamma$ -PGA synthesis was reported to be regulated by the  
258 two-component systems ComA-ComP and DegS-DegU, DegQ and SwrA systems (5).  
259 The  $\gamma$ -PGA synthesis capability was abolished in the *degQ* mutant strain, and  
260 phosphorylated DegU (DegU-P) and SwrA could up-regulate the expression level of  
261 *pgs* operon for  $\gamma$ -PGA synthesis (6, 7). Since TnrA was reported to be the repressor  
262 for *degU* expression (18), the transcriptional level of *degU* was increased by 1.68-fold  
263 in the *tnrA* deficient strain, thus, TnrA could affect  $\gamma$ -PGA synthesis through  
264 up-regulating the expression levels of *degU*, and the increase of *degU* transcriptional  
265 level was beneficial for  $\gamma$ -PGA synthesis. In our work, in order to exclude the  
266 interference of regulator DegU, we deleted gene *degU* in WX-02 and WX $\Delta$ *tnrA*, and  
267 further analyze the regulation mechanism of *pgsBCAA* promote by TnrA in the *degU*  
268 mutant strains. Our results confirmed that nattokinase activity produced by  
269 WX $\Delta$ *tnrA* $\Delta$ *degU*/pPgsBSacCNK was increased obviously compared to  
270 WX $\Delta$ *degU*/pPgsBSacCNK. Additionally, the TnrA-binding site  
271 “CGTCGTCTTCTGTTACA” was identified in the *pgsBCAA* promoter of *B.*  
272 *licheniformis* WX-02. Therefore, our results confirmed that TnrA could directly  
273 repress the transcription of *pgsBCAA* by binding to its promoter, in addition to the  
274 indirect effect of DegU. Nonetheless, the in-depth research is worth to explore that  
275 which pathway plays the major role for the improvement of  $\gamma$ -PGA yield in the *tnrA*  
276 mutant strain.

277 *Bacillus* species were the important industrial production strains (32), and they

278 could produce various kinds of bio-chemical products (33), also, *Bacillus* could be  
279 acted as the host strains for protein expression (34). Among them, *B. subtilis*, *B.*  
280 *licheniformis*, *B. amyloliquefaciens* are the three well-studied *Bacillus* species, and  
281 they are also the main producers for  $\gamma$ -PGA synthesis (29). Furthermore, these species  
282 have a high degree of homology, *B. licheniformis* owns a nearly 75% identity with *B.*  
283 *subtilis* at the genome-level, and *B. amyloliquefaciens* has been regarded as a  
284 subspecies of *B. subtilis*, which genome identity is more than 80% with *B. subtilis*.  
285 Thus, these species might belong to the same branch in evolutionary terms. Based on  
286 our results, the TnrA boxes of *pgsBCAA* promoters were predicted in the most of  
287 these strains (**Table 3**), thus, our results suggested that the regulation of  $\gamma$ -PGA  
288 synthase PgsBCAA by TnrA might be conserved in *Bacillus*.

289 In conclusion, the regulation model of  $\gamma$ -PGA synthase PgsBCAA by nitrogen  
290 regulator TnrA was analyzed in this study. Based on our results, the  $\gamma$ -PGA synthesis  
291 was negatively regulated by TnrA, and deficiency of *tnrA* led to a 22.03% increase of  
292  $\gamma$ -PGA yield. Transcriptional analysis confirmed that *pgsBCAA* expression level was  
293 all increased in the *tnrA* deficient strain, and EMSA and enzyme expression assays  
294 confirmed that the expression of *pgsBCAA* was directly negatively regulated by the  
295 regulator TnrA, and the TnrA-binding site was identified in the *pgsBCAA* promoter of  
296 *B. licheniformis*. Finally, we demonstrated that the TnrA-binding sites in the  
297 *pgsBCAA* promoters were highly conserved in *Bacillus*. Taken together, our results  
298 implied that TnrA was a direct repressor for *pgsBCAA* expression in  $\gamma$ -PGA synthesis,  
299 and our research provided a novel regulatory mechanism underlying  $\gamma$ -PGA synthesis,

300 and a new approach that deficiency of *tnrA* increases  $\gamma$ -PGA production.

## 301 **Materials and methods**

### 302 **Bacterial strains and plasmids**

303 The strains and plasmids used in this research were provided in **Table 1**. *B.*  
304 *licheniformis* WX-02 acts as the original strain for constructing mutants. The plasmid  
305 T<sub>2</sub>(2)-Ori was applied to construct the *tnrA* knockout vector T<sub>2</sub>-tnrA. The TnrA  
306 overexpression vector pHY-tnrA was obtained based on pHY300. All primers used  
307 for strain construction were provided in **Table 2**.

### 308 **Medium and cultivate condition**

309 LB medium (10 g/L Tryptone, 5 g/L yeast extract, 10 g/L NaCl, pH 7.2) was  
310 served as the basic medium for strain cultivation, and responsible antibiotic (20  
311  $\mu$ g/mL kanamycin, 50  $\mu$ g/mL ampicillin or 20  $\mu$ g/mL tetracycline) was added into the  
312 medium when necessary. The seed culture of *B. licheniformis* was prepared in a 250  
313 mL flask with 50 mL LB medium, and incubated at the rotatory shaker with 180 rpm  
314 at 37°C for 10-12 h until OD<sub>600</sub> reached 4.0~4.5, and then transferred into the  $\gamma$ -PGA  
315 and nattokinase production medium, respectively. The  $\gamma$ -PGA production medium  
316 consisted of (per liter) 80 g glucose, 30 g glutamic acid, 10 g sodium citrate, 8 g  
317 NH<sub>4</sub>Cl, 1 g CaCl<sub>2</sub>, 1 g K<sub>2</sub>HPO<sub>4</sub>·3H<sub>2</sub>O, 1 g MgSO<sub>4</sub>·7H<sub>2</sub>O, 1 g ZnSO<sub>4</sub>·7H<sub>2</sub>O and 0.15 g  
318 MnSO<sub>4</sub>·7H<sub>2</sub>O at pH 7.2(25). The nattokinase fermentation medium contained (per  
319 liter) 20 g glucose, 10 g peptone, 5 g yeast extract, 10 g NaCl, 10 g soy peptone, 10 g  
320 corn steep liquor, and 6 g (NH<sub>4</sub>)<sub>2</sub>SO<sub>4</sub>, pH 7.2 (35). The fermentation conditions were  
321 the same as those of the seed culture.

## 322 **Construction of *tnrA* deletion strain**

323 The *tnrA* mutant strain was constructed according to our previous method (35).  
324 Briefly, the up-stream and down-stream homologous arms of *tnrA* were amplified  
325 with the corresponding primers, and fused by Splicing-Overlapping-Extension PCR  
326 (SOE-PCR). The fused fragments were then inserted into the plasmid T<sub>2</sub>(2)-Ori at the  
327 restriction sites *Xba*I and *Sac*I, diagnostic PCR and DNA sequence were used to  
328 confirm that the recombinant plasmid (T<sub>2</sub>-*tnrA*) was constructed successfully.

329 The vector T<sub>2</sub>-*tnrA* was electro-transferred into *B. licheniformis* by the previous  
330 reported method, verified by diagnostic PCR and plasmid extraction (36). The  
331 positive transformants were cultivated in the LB medium with 20 µg/mL kanamycin  
332 at 45°C to promote the single-cross transformation for three generations, and then  
333 transferred into the kanamycin-free medium at 37°C for six generations. Then, the  
334 kanamycin-sensitive colonies were verified by diagnostic PCR, and the mutant strain  
335 was confirmed by DNA sequencing, named as WXΔ*tnrA*.

## 336 **Construction of expression vectors**

337 The expression vectors were constructed via according to the following steps,  
338 and the TnrA expression vector was served as an example. Briefly, the P43 promoter  
339 of *B. subtilis* 168 (K02174.1), gene *tnrA* (3101408) and *amyL* terminator (FJ556804.1)  
340 of *B. licheniformis* WX-02 were amplified using the corresponding primers, and fused  
341 by SOE-PCR. The fused fragments were inserted into the expression vector  
342 pHY300PLK at the restriction sites *Xba*I and *Eco*RI. Diagnostic PCR and DNA  
343 sequence were used to confirm that the recombinant plasmid (pHY-*tnrA*) was



344 constructed successfully. Similarly, the nattokinase expression vector mediated by  
345 *pgsB* promoter was constructed by the same method, named as pPgsBSacCNK, and  
346 the nattokinase expression vector mediated by P43 promoter pP43SacCNK was  
347 obtained in our previous research (37).

#### 348 **Analytical methods**

349 Cell biomass was measured based on cell dry weight. The  $\gamma$ -PGA concentration  
350 was determined by High performance liquid chromatography (HPLC) according to  
351 the method described in our previous research (38). Glucose and glutamic acid  
352 concentrations were measured by a SBA-40C bioanalyzer according to the manual  
353 instruction (Academy of sciences, Shandong, China).

#### 354 **Expression and purification of TnrA in *Escherichia coli***

355 The TnrA induced expression vector was constructed based on the following  
356 steps. Briefly, the fragment of *tnrA* (3101408) was amplified from *B. licheniformis*  
357 WX-02 using the corresponding primers, and inserted into the induced vector  
358 pET-28a at the restriction sites *EcoRI* and *XhoI*. The recombinant plasmid pET-TnrA  
359 was verified by diagnostic PCR and DNA sequence. Expression and purification of  
360 TnrA were performed as described previously (39). The purified proteins were  
361 verified by sodium dodecyl sulfate-polyacrylamide gel electrophoresis (SDS-PAGE),  
362 and protein concentration was measured by a microplate reader (Bio-Rad, USA).

#### 363 **Electrophoretic mobility shift assays**

364 The sequence of *pgsBCAA* promoter (Gene ID: 3028267, from -300 to +50) for  
365 electrophoretic mobility shift assays (EMSAs) were amplified with gene-specific

366 primers containing 5'-biotin-modified universal primer. The PCR products were  
367 analyzed by agarose gel electrophoresis and purified using a PCR purification kit  
368 (Omega, USA). The concentration of biotin-labeled DNA probe was determined using  
369 a trace Spectrophotometer NanoDrop 2000 (Thermo, USA). For amplification the  
370 *pgsBCAA* promoter without the TnrA binding site ( $P_{pgsB'}$ ), SOE-PCR was applied to  
371 fuse the upstream and downstream fragments of TnrA binding site, and formed the  
372 fragment  $P_{pgsB'}$ .

373 The EMSAs were carried out according to the manufacturer's protocol of the  
374 chemiluminescent EMSA kit (Beyotime Biotechnology, China). The binding reaction  
375 mixture containing 10 mM Tris-HCl (pH 8.0), 25 mM MgCl<sub>2</sub>, 50 mM NaCl, 1 mM  
376 dithiothreitol (DTT), 1 mM EDTA, 0.01% Nonidet P-40, 50 µg/mL  
377 poly(deoxyinosinic-deoxycytidylic) acid (poly(dI-dC)), and 10% glycerol.  
378 Biotin-labeled DNA probes were incubated individually with various concentrations  
379 of TnrA proteins at 25°C for 20 min. After binding, the samples were separated on a 4%  
380 nondenaturing PAGE gel in an ice-bath of 0.5×Tris-borate-EDTA (TBE) at 100 V, and  
381 trans-blotted to nylon membrane with mini trans-blot electrophoresis apparatus (Liuyi,  
382 China). Then, the membrane was treated by Chemiluminescent EMSA Kit (Beyotime,  
383 China) and analyzed with the MF-ChemiBIS (DNR Bio-imaging systems, Israel) (40).

#### 384 **Transcriptional level assay**

385 The gene transcriptional levels of mutant strains were analyzed based on the  
386 previously reported method (8). In brief, total RNA was extracted by TRIzol<sup>®</sup> Reagent,  
387 and the trace DNA was digested by DNase I. The first stand of cDNA was amplified

388 by the Revert Aid First Strand cDNA Synthesis Kit (Thermo, USA). The 16S rRNA of  
389 *B. licheniformis* WX-02 was used as the reference gene. The gene transcriptional  
390 levels of recombinant strains were compared with those of the control strain after  
391 being normalized to the reference gene 16S rRNA. All the experiments were  
392 performed in triplicates.

### 393 **Nattokinase activity assay**

394 The nattokinase activity was measured by fibrin degradation method (35). In  
395 brief, 0.4 mL fibrinogen solution (0.72%, w/v) and 1.4 mL Tris-HCl (50 mM, pH 7.8)  
396 were mixed and incubated at 37°C for 5 min, added 0.1 mL thrombin (20 U/mL) and  
397 incubated at 37°C for 10 min. The prepared fibrin-substrate solution was then mixed  
398 with 0.1 mL nattokinase-containing broth, and incubated at 37°C for 60 min and  
399 shook every 20 min during the incubation. Then, 2 mL trichloroacetic acid (TCA)  
400 solution (0.2 M) was added to stop the reaction. As a control, 0.1 mL  
401 nattokinase-containing broth and 2 mL TCA solution (0.2 M) were added into the  
402 prepared fibrin-substrate solution after incubating at 37°C for 60 min. The samples  
403 were centrifuged at 13,000 g for 10 min and measured the absorbance at 275 nm. One  
404 unit nattokinase activity (FU) was defined as the amount of enzyme leading to 0.01  
405 increase of absorbance in 1 min.

### 406 **Computational analysis**

407 The TnrA binding sites in the *pgsBCAA* promoters of various *Bacillus* strains  
408 were identified by MEME/MAST tools (<http://meme-suite.org/>), according to the  
409 conserved TnrA box reported in the previous research (40).

410 **Statistical analyses**

411 All samples were analyzed in triplicate, and the data were presented as the mean  
412  $\pm$  the standard deviation for each sample point. All data were conducted to analyze the  
413 variance at  $P < 0.05$  and  $P < 0.01$ , and a *t* test was applied to compare the mean values  
414 using the software package Statistica 6.0 (35).

415

416 **Competing interests**

417 The authors declare that they have no competing interests.

418 **Athour's contribution**

419 D Cai and S Chen designed the study. D Cai and Y Chen carried out the  
420 molecular biology studies and construction of engineering strains. D Cai, Y Chen, S  
421 Wang and F Mo carried out the fermentation studies. D Cai, X Ma and S Chen  
422 analyzed the data and wrote the manuscript. All authors read and approved the final  
423 manuscript.

424 **Acknowledgments**

425 This work was supported by the National Program on Key Basic Research  
426 Project (973 Program, No. 2015CB150505), the Science and Technology Program of  
427 Wuhan (20160201010086).

428 **Supporting Information**

429 All the primers sequences for RT-qPCR were listed in **Table S1**. These  
430 information were available free of charge via the Internet: <http://aem.asm.org/>.

431

432 **Reference**

- 433 1. **Candela T, Fouet A.** 2006. Poly-gamma-glutamate in bacteria. *Mol Microbiol* **60**:1091-1098.
- 434 2. **Ogunleye A, Bhat A, Irorere VU, Hill D, Williams C, Radecka I.** 2015.  
435 Poly-gamma-glutamic acid: production, properties and applications. *Microbiology* **161**:1-17.
- 436 3. **Hsueh YH, Huang KY, Kunene SC, Lee TY.** 2017. Poly-gamma-glutamic Acid Synthesis,  
437 Gene Regulation, Phylogenetic Relationships, and Role in Fermentation. *Int J Mol Sci* **18**.
- 438 4. **Buescher JM, Margaritis A.** 2007. Microbial biosynthesis of polyglutamic acid biopolymer  
439 and applications in the biopharmaceutical, biomedical and food industries. *Crit Rev*  
440 *Biotechnol* **27**:1-19.
- 441 5. **Tran LS, Nagai T, Itoh Y.** 2000. Divergent structure of the ComQXPA quorum-sensing  
442 components: molecular basis of strain-specific communication mechanism in *Bacillus subtilis*.  
443 *Mol Microbiol* **37**:1159-1171.
- 444 6. **Ohsawa T, Tsukahara K, Ogura M.** 2009. *Bacillus subtilis* response regulator DegU is a  
445 direct activator of *pgsB* transcription involved in gamma-poly-glutamic acid synthesis. *Biosci*  
446 *Biotechnol Biochem* **73**:2096-2102.
- 447 7. **Ogura M, Tsukahara K.** 2012. SwrA regulates assembly of *Bacillus subtilis* DegU via its  
448 interaction with N-terminal domain of DegU. *J Biochem* **151**:643-655.
- 449 8. **Cai D, He P, Lu X, Zhu C, Zhu J, Zhan Y, Wang Q, Wen Z, Chen S.** 2017. A novel  
450 approach to improve poly- $\gamma$ -glutamic acid production by NADPH Regeneration in *Bacillus*  
451 *licheniformis* WX-02. *Sci Rep* **7**:43404.
- 452 9. **Scoffone V, Dondi D, Biino G, Borghese G, Pasini D, Galizzi A, Calvio C.** 2013. Knockout  
453 of *pgdS* and *ggt* genes improves gamma-PGA yield in *B. subtilis*. *Biotechnol Bioeng*  
454 **110**:2006-2012.
- 455 10. **Feng J, Gu Y, Quan Y, Cao M, Gao W, Zhang W, Wang S, Yang C, Song C.** 2015.  
456 Improved poly-gamma-glutamic acid production in *Bacillus amyloliquefaciens* by modular  
457 pathway engineering. *Metab Eng* **32**:106-115.
- 458 11. **Wray LV, Jr., Zalieckas JM, Fisher SH.** 2001. *Bacillus subtilis* glutamine synthetase  
459 controls gene expression through a protein-protein interaction with transcription factor TnrA.  
460 *Cell* **107**:427-435.
- 461 12. **Wray LV, Jr., Atkinson MR, Fisher SH.** 1994. The nitrogen-regulated *Bacillus subtilis*  
462 *nrgAB* operon encodes a membrane protein and a protein highly similar to the *Escherichia coli*  
463 *glnB*-encoded PII protein. *J bacteriol* **176**:108-114.
- 464 13. **Nakano MM, Yang F, Hardin P, Zuber P.** 1995. Nitrogen regulation of *nasA* and the *nasB*  
465 operon, which encode genes required for nitrate assimilation in *Bacillus subtilis*. *J bacteriol*  
466 **177**:573-579.
- 467 14. **Nakano MM, Hoffmann T, Zhu Y, Jahn D.** 1998. Nitrogen and oxygen regulation of  
468 *Bacillus subtilis nasDEF* encoding NADH-dependent nitrite reductase by TnrA and ResDE. *J*  
469 *bacteriol* **180**:5344-5350.
- 470 15. **Zalieckas JM, Wray LV, Jr., Fisher SH.** 2006. Cross-regulation of the *Bacillus subtilis*  
471 *glnRA* and *tnrA* genes provides evidence for DNA binding site discrimination by GlnR and  
472 TnrA. *J bacteriol* **188**:2578-2585.
- 473 16. **Belitsky BR, Wray LV, Jr., Fisher SH, Bohannon DE, Sonenshein AL.** 2000. Role of TnrA  
474 in nitrogen source-dependent repression of *Bacillus subtilis* glutamate synthase gene  
475 expression. *J Bacteriol* **182**:5939-5947.
- 476 17. **Tojo S, Satomura T, Morisaki K, Yoshida K, Hirooka K, Fujita Y.** 2004. Negative

- 477 transcriptional regulation of the *ilv-leu* operon for biosynthesis of branched-chain amino acids  
478 through the *Bacillus subtilis* global regulator TnrA. J Bacteriol **186**:7971-7979.
- 479 18. **Yasumura A, Abe S, Tanaka T.** 2008. Involvement of nitrogen regulation in *Bacillus subtilis*  
480 *degU* expression. J Bacteriol **190**:5162-5171.
- 481 19. **Mirouze N, Bidnenko E, Noirot P, Auger S.** 2015. Genome-wide mapping of TnrA-binding  
482 sites provides new insights into the TnrA regulon in *Bacillus subtilis*. MicrobiologyOpen  
483 **4**:423-435.
- 484 20. **Wei X, Ji Z, Chen S.** 2010. Isolation of halotolerant *Bacillus licheniformis* WX-02 and  
485 regulatory effects of sodium chloride on yield and molecular sizes of poly-gamma-glutamic  
486 acid. Appl Biochem Biotechnol **160**:1332-1340.
- 487 21. **Guo J, Cheng G, Gou XY, Xing F, Li S, Han YC, Wang L, Song JM, Shu CC, Chen SW,  
488 Chen LL.** 2015. Comprehensive transcriptome and improved genome annotation of *Bacillus*  
489 *licheniformis* WX-02. FEBS Lett **589**:2372-2381.
- 490 22. **Wei X, Tian G, Ji Z, Chen S.** 2015. A new strategy for enhancement of poly- $\gamma$ -glutamic acid  
491 production by multiple physicochemical stresses in *Bacillus licheniformis* WX-02. J Chem  
492 Technol Biotechnol **90**:709-713.
- 493 23. **Wang J, Yuan H, Wei X, Chen J, Chen S.** 2015. Enhancement of poly- $\gamma$ -glutamic acid  
494 production by alkaline pH stress treatment in *Bacillus licheniformis* WX-02. J Chem Technol  
495 Biotechnol **121**:1444-1447.
- 496 24. **Li X, Gou X, Long D, Ji Z, Hu L, Xu D, Liu J, Chen S.** 2014. Physiological and metabolic  
497 analysis of nitrate reduction on poly-gamma-glutamic acid synthesis in *Bacillus licheniformis*  
498 WX-02. Arch Microbiol **196**:791-799.
- 499 25. **Cai D, Hu S, Chen Y, Liu L, Yang S, Ma X, Chen S.** 2018. Enhanced Production of  
500 Poly- $\gamma$ -glutamic acid by Overexpression of the Global Anaerobic Regulator Fnr in *Bacillus*  
501 *licheniformis* WX-02. Appl Biochem Biotechnol.
- 502 26. **Zhan Y, Zhu C, Sheng B, Cai D, Wang Q, Wen Z, Chen S.** 2017. Improvement of glycerol  
503 catabolism in *Bacillus licheniformis* for production of poly-gamma-glutamic acid. Appl  
504 Microbiol Biotechnol **101**:7155-7164.
- 505 27. **Schumacher MA, Chinnam NB, Cuthbert B, Tonthat NK, Whitfill T.** 2015. Structures of  
506 regulatory machinery reveal novel molecular mechanisms controlling *B. subtilis* nitrogen  
507 homeostasis. Genes Dev **29**:451-464.
- 508 28. **Yoshida K, Yamaguchi H, Kinehara M, Ohki YH, Nakaura Y, Fujita Y.** 2003.  
509 Identification of additional TnrA-regulated genes of *Bacillus subtilis* associated with a TnrA  
510 box. Mol Microbiol **49**:157-165.
- 511 29. **Luo Z, Guo Y, Liu J, Qiu H, Zhao M, Zou W, Li S.** 2016. Microbial synthesis of  
512 poly-gamma-glutamic acid: current progress, challenges, and future perspectives. Biotechnol  
513 Biofuels **9**:134.
- 514 30. **Feng J, Quan Y, Gu Y, Liu F, Huang X, Shen H, Dang Y, Cao M, Gao W, Lu X, Wang Y,  
515 Song C, Wang S.** 2017. Enhancing poly-gamma-glutamic acid production in *Bacillus*  
516 *amyloliquefaciens* by introducing the glutamate synthesis features from *Corynebacterium*  
517 *glutamicum*. Microb Cell Fact **16**:88.
- 518 31. **Meissner L, Kauffmann K, Wengeler T, Mitsunaga H, Fukusaki E, Buchs J.** 2015.  
519 Influence of nitrogen source and pH value on undesired poly(gamma-glutamic acid) formation  
520 of a protease producing *Bacillus licheniformis* strain. J Ind Microbiol Biotechnol

- 521           **42:1203-1215.**
- 522   32.   **Freyre-Gonzalez JA, Manjarrez-Casas AM, Merino E, Martinez-Nunez M, Perez-Rueda**  
523           **E, Gutierrez-Rios RM.** 2013. Lessons from the modular organization of the transcriptional  
524           regulatory network of *Bacillus subtilis*. *BMC Syst Biol* **7:127.**
- 525   33.   **Liu Y, Li J, Du G, Chen J, Liu L.** 2017. Metabolic engineering of *Bacillus subtilis* fueled by  
526           systems biology: Recent advances and future directions. *Biotechnol Adv* **35:20-30.**
- 527   34.   **Kang Z, Yang S, Du G, Chen J.** 2014. Molecular engineering of secretory machinery  
528           components for high-level secretion of proteins in *Bacillus species*. *J Ind Microbiol*  
529           *Biotechnol* **41:1599-1607.**
- 530   35.   **Cai D, Wang H, He P, Zhu C, Wang Q, Wei X, Nomura CT, Chen S.** 2017. A novel  
531           strategy to improve protein secretion via overexpression of the SppA signal peptide peptidase  
532           in *Bacillus licheniformis*. *Microb Cell Fact* **16:70.**
- 533   36.   **Cai D, Wei X, Qiu Y, Chen Y, Chen J, Wen Z, Chen S.** 2016. High-level expression of  
534           nattokinase in *Bacillus licheniformis* by manipulating signal peptide and signal peptidase. *Jf*  
535           *Appl Microbiol* **121:704-712.**
- 536   37.   **Wei X, Zhou Y, Chen J, Cai D, Wang D, Qi G, Chen S.** 2015. Efficient expression of  
537           nattokinase in *Bacillus licheniformis*: host strain construction and signal peptide optimization.  
538           *J Ind Microbiol Biotechnol* **42:287-295.**
- 539   38.   **Tian G, Wang Q, Wei X, Ma X, Chen S.** 2017. Glutamate dehydrogenase (RocG) in *Bacillus*  
540           *licheniformis* WX-02: enzymatic properties and specific functions in glutamic acid synthesis  
541           for Poly- $\gamma$ -glutamic acid production. *Enzyme Microb Technol*:9-15.
- 542   39.   **Huo Y, Zhan Y, Wang Q, Li S, Yang S, Nomura CT, Wang C, Chen S.** 2018. Acetolactate  
543           synthase (AlsS) in *Bacillus licheniformis* WX-02: enzymatic properties and efficient functions  
544           for acetoin/butanediol and L-valine biosynthesis. *Bioprocess Biosyst Eng* **41:87-96.**
- 545   40.   **Xu Y, Liao CH, Yao LL, Ye X, Ye BC.** 2016. GlnR and PhoP directly regulate the  
546           transcription of genes encoding starch-degrading, amylolytic enzymes in *Saccharopolyspora*  
547           *erythraea*. *Applied Environ Microbiol*.

548

549



550 **Figure captions**

551 **Fig. 1: Effects of *tnrA* deficiency and overexpression on  $\gamma$ -PGA production.** Data  
552 are represented as the means of three replicates and bars represent the standard  
553 deviations, \*,  $P < 0.05$ ; and \*\*,  $P < 0.01$  indicate the significance levels between  
554 recombinant strains and control strain.

555

556 **Fig. 2: Fermentation process curve of *B. licheniformis* WX-02, WX $\Delta$ *tnrA*,  
557 WX/pHY300 and WX/pHY-TnrA.** A:  $\gamma$ -PGA; B: Cell biomass; C: Glucose  
558 concentrations; D: Glutamic acid concentrations.

559

560 **Fig. 3: Transcriptional level analysis.** A: Effects of *tnrA* deficiency on the relative  
561 transcriptional levels of genes in  $\gamma$ -PGA biosynthesis; B: Effects of *tnrA* deficiency on  
562 the relative transcriptional levels of genes in glucose metabolism.

563

564 **Fig. 4: EMSA assay and identification of the TnrA binding site in the *pgsBCAA*  
565 promoter.** A: **Expression and purification of TnrA in BL21(DE3);** Lane 1: The  
566 protein Marker (170 DKa, 130 DKa, 100 DKa, 70 DKa, 55 DKa, 40 DKa, 35 DKa, 25  
567 DKa, 15 DKa,), Lane 2: The total intracellular protein of BL21/pET-TnrA before  
568 induction, Lane 3: The total intracellular protein of BL21/pET-TnrA induced by IPTG,  
569 Lane 4: The purified TnrA protein. The arrow indicates the purified TnrA (13.17  
570 KDa); B: **EMSA assay of the purified TnrA protein and *pgsBCAA* promoter.**  
571 Lane 1: EMSA of TnrA protein (200 ng) with biotin-labeled *pgsBCAA* promoter P<sub>*pgsB*</sub>,



572 which lacking out of the TnrA binding site “CGTCGTCTTCTGTTACA”, as the  
573 negative group; Lane 2-4: EMSA of different TnrA concentrations (0, 100 ng, 200 ng)  
574 with biotin-labeled *pgsBCAA* promoter (-300 to +50 bp upstream and downstream of  
575 the translational start), and the arrow indicates the mixture of TnrA with *pgsB*  
576 promoter. **C: Identification of the TnrA-binding site in the *pgsBCAA* promoter of**  
577 ***B. licheniformis* WX-02.**

578

579 **Fig. 5: Confirmation of the regulation model of  $\gamma$ -PGA biosynthesis by TnrA via**  
580 **nattokinase expression assay. A:** nattokinase activity produced by  
581  $WX\Delta degU/pPgsBSacCNK$  and  $WX\Delta tnrA\Delta degU/pPgsBSacCNK$ ; **B:** nattokinase  
582 activity produced by  $WX\Delta degU/pP43SacCNK$  and  $WX\Delta tnrA\Delta degU/pP43SacCNK$ .

583

584 **Fig. 6 The proposed regulatory network of TnrA in  $\gamma$ -PGA biosynthesis in *B.***  
585 ***licheniformis*** (The black lines indicate the previously proven regulatory mechanisms  
586 in *Bacillus*, the cyan line indicates the regulatory mechanism confirmed in this  
587 research).

588

**Table 1** The strains and plasmids used in this research

| Strains or plasmids                        | Description                                                                                                                                                 | Source of reference |
|--------------------------------------------|-------------------------------------------------------------------------------------------------------------------------------------------------------------|---------------------|
| <i>Bacillus licheniformis</i>              |                                                                                                                                                             |                     |
| WX-02                                      | Poly $\gamma$ -glutamate productive strain (CCTCC M208065)                                                                                                  | CCTCC               |
| WX $\Delta$ tnrA                           | WX-02 ( $\Delta$ tnrA)                                                                                                                                      | This study          |
| WX/pHY300                                  | WX-02 harboring pHY-300, as control                                                                                                                         | This study          |
| WX/pHY-TnrA                                | WX-02 harboring pHY-TnrA                                                                                                                                    | This study          |
| WX $\Delta$ degU                           | WX-02 ( $\Delta$ degU)                                                                                                                                      | This study          |
| WX $\Delta$ tnrA $\Delta$ degU             | WX-02 ( $\Delta$ tnrA; $\Delta$ degU)                                                                                                                       | This study          |
| WX $\Delta$ degU/pP43SacCNK                | WX $\Delta$ degU harboring pP43SacCNK                                                                                                                       | This study          |
| WX $\Delta$ degU/pPgsBSacCNK               | WX $\Delta$ degU harboring pPgsBSacCNK                                                                                                                      | This study          |
| WX $\Delta$ tnrA $\Delta$ degU/pP43SacCNK  | WX $\Delta$ tnrA $\Delta$ degU harboring pP43SacCNK                                                                                                         | This study          |
| WX $\Delta$ tnrA $\Delta$ degU/pPgsBSacCNK | WX $\Delta$ tnrA $\Delta$ degU harboring pPgsBSacCNK                                                                                                        | This study          |
| <b>Plasmids</b>                            |                                                                                                                                                             |                     |
| T <sub>2</sub> (2)-Ori                     | <i>Bacillus</i> knockout vector; Kan <sup>r</sup>                                                                                                           | This study          |
| T <sub>2</sub> -tnrA                       | T2(ori)-tnrA(A+B); to knock out <i>tnrA</i>                                                                                                                 | This study          |
| T <sub>2</sub> -degU                       | T2(ori)-degU(A+B); to knock out <i>degU</i>                                                                                                                 | This study          |
| pHY300PLK                                  | <i>E. coli</i> - <i>B. licheniformis</i> shuttle vector, Ap <sup>r</sup> ( <i>E. coli</i> ), Tc <sup>r</sup> ( <i>E. coli</i> and <i>B. licheniformis</i> ) | This study          |
| pHY-tnrA                                   | pHY300PLK containing P43 promoter, gene <i>tnrA</i> and <i>amyL</i> terminator                                                                              | This study          |
| pPgsBSacCNK                                | pHY300PLK containing <i>pgsB</i> promoter, signal peptide of SacB, gene <i>aprN</i> and <i>amyL</i> terminator                                              | This study          |
| pP43SacCNK                                 | pHY300PLK containing P43 promoter, signal peptide of SacB, gene <i>aprN</i> and <i>amyL</i> terminator                                                      | This study          |
| pET-28a                                    | Induced expression vector                                                                                                                                   | This study          |
| pET-TnrA                                   | TnrA induced expression vector                                                                                                                              | This study          |

Table 2 The primers used in this research

| Primers   | Sequence 5'-3'                                         | Function                                                     |
|-----------|--------------------------------------------------------|--------------------------------------------------------------|
| TnrA-F1   | GGGAGCTCTTCCCGATTATGCTCACC                             | Amplification of upstream                                    |
| TnrA-R1   | AATGAGCGTTAAGCTGGCCTTTTCCACCCCTAAGATGACTT              | homologous arm of <i>tnrA</i>                                |
| TnrA-F2   | AAGTCATCTTAGGGGTGGGAAAAAGCCAGCTTAACGCTCATT             | Amplification of downstream                                  |
| TnrA-R2   | GCTCTAGAGAATGTCCACGAAATGCT                             | homologous arm of <i>tnrA</i>                                |
| TnrA-KYF  | CATAGCACGGTGAACCTCTT                                   | Verification of <i>tnrA</i> mutant                           |
| TnrA-KYR  | GATAAGAATAAATGATTTTCAG                                 | strain                                                       |
| degU-KFI  | CGGGATCCCGCGCATCTTCAGAGACAAAGGAACAG                    | Amplification of upstream                                    |
| degU-KRI  | CCTGCGTTCTGTCGTTTACATTCATTGACACCTTCACGGAATAACT<br>GATG | homologous arm of <i>degU</i>                                |
| degU-KF2  | CATCAGTTATTCCGTGAAGGTGTCAATGAATGTAAACGACAGAAC<br>GCAGG | Amplification of downstream<br>homologous arm of <i>degU</i> |
| degU-KR2  | GCTCTAGAGCGTGTCAACCATAAAAATAAGCCCTC                    |                                                              |
| degU-KYF  | GGAAGAAAAGAAAAGGGTCTCAAGG                              | Verification of <i>degU</i> mutant                           |
| degU-KYR  | GAACGATCAGCTTGTCTCAAAATG                               | strain                                                       |
| P43-F     | CGGAATTC TGATAGGTGGTATGTTTTTCG                         | Amplification of P43 promoter                                |
| P43-R     | AAGAAAGATCTTCGACTGTCATGTGTACATTCCTCTCTTACC             |                                                              |
| TnrA-F    | GGTAAGAGAGGAATGTACACATGACAGTCGAAGATCTTTCTT             | Amplification of gene <i>tnrA</i>                            |
| TnrA-R    | GAAATCCGTCCTCTCTGCTCTTTTAACGGTTTTTGTATTTAAAA           |                                                              |
| TamyL-F   | TTTTAAATACAAAAACCGTTAAAAGAGCAGAGAGGACGGATTTC           | Amplification of <i>amyL</i>                                 |
| TamyL-R   | GC TCTAGA GCCCAATAATGCCGTCGCACTG                       | terminator                                                   |
| PpgsB-F   | GATCCTGAATCCATCCTTCAA                                  | Amplification of <i>pgsB</i>                                 |
| PpgsB-R   | TAAATGCCGATCCCAACAACG                                  | promoter                                                     |
| PpgsB-1-F | GATCTTTGTACGGAATAATTGATCTTTGTACGGAATAATT               | Amplification of <i>pgsB</i>                                 |
| PpgsB-1-R | AAATTTCCGTGACAAAAGATCAAATTTCCGTGACAAAAGATC             | promoter without TnrA<br>binding site                        |
| T2-F      | ATGTGATAACTCGGCGTA                                     | Verification of <i>tnrA</i> knockout                         |
| T2-R      | GCAAGCAGCAGATTACGC                                     | vector                                                       |
| pHY-F     | GTTTATTATCCATACCCTTAC                                  | Verification of expression                                   |
| pHY-R     | CAGATTTTCGTGATGCTTGTC                                  | vector                                                       |
| 28-TnrA-F | CGGAATTCATGACAGTCGAAGATCTTTCTTA                        | Amplification of gene <i>tnrA</i> for                        |
| 28-TnrA-R | CCGCTCGAGTTAACGGTTTTTGTATTTAAAA                        | induced expression vector<br>construction                    |
| 28-Y-F    | TAATACGACTCACTATAGGG                                   | Verification of induced                                      |
| 28-Y-R    | TGCTAGTTATTGCTCAGCGG                                   | expression vector                                            |

Table 3 The predicted TnrA box of  $\gamma$ -PGA synthase gene *pgsBCAA* in various *Bacillus* strains

| Strains                                | Genes names    | Annotations            | TnrA boxes        |
|----------------------------------------|----------------|------------------------|-------------------|
| <i>Bacillus licheniformis</i> WX-02    | <i>pgsBCAA</i> | $\gamma$ -PGA synthase | CGTCGTCTTCTGTTACA |
| <i>Bacillus licheniformis</i> 14580    | <i>pgsBCAA</i> | $\gamma$ -PGA synthase | CGTCGTCTTCTGTTACA |
| <i>Bacillus subtilis</i> 168           | <i>pgsBCAA</i> | $\gamma$ -PGA synthase | GGGAAGATTATGTTACA |
| <i>Bacillus amyloliquefaciens</i> DSM7 | <i>pgsBCAA</i> | $\gamma$ -PGA synthase | GAGGAGATTATGTTACA |

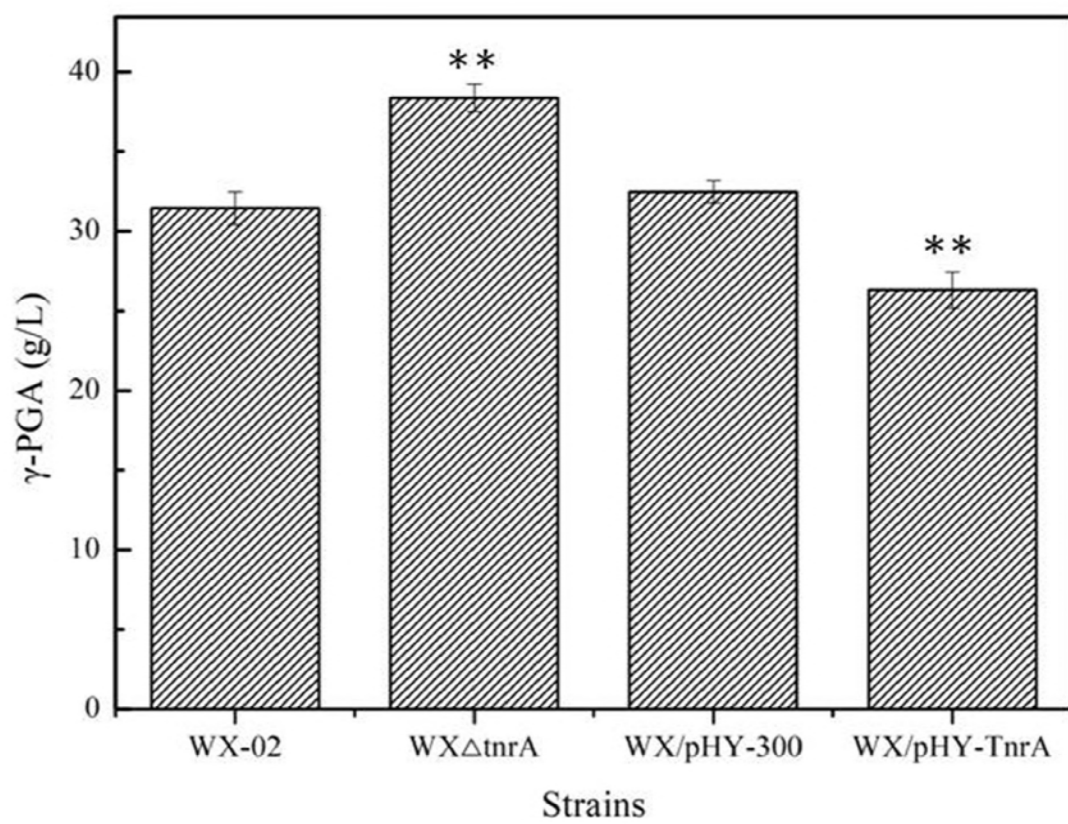

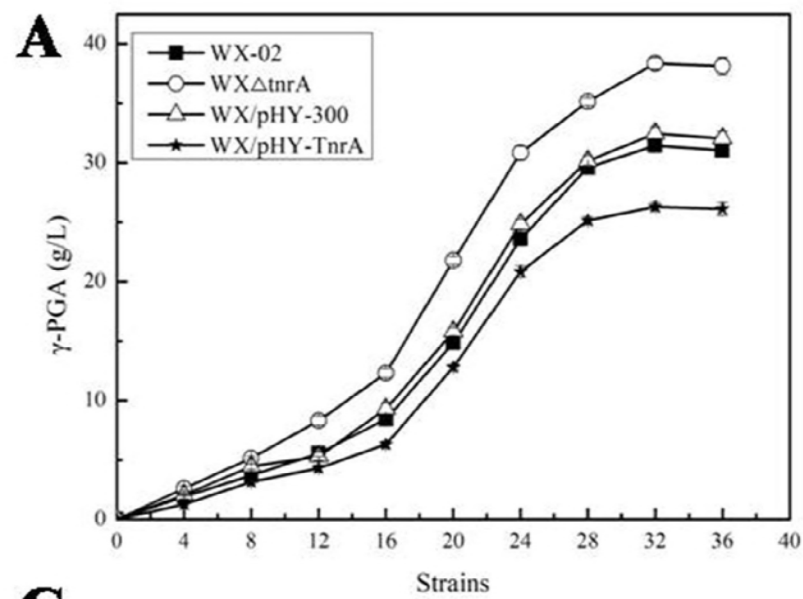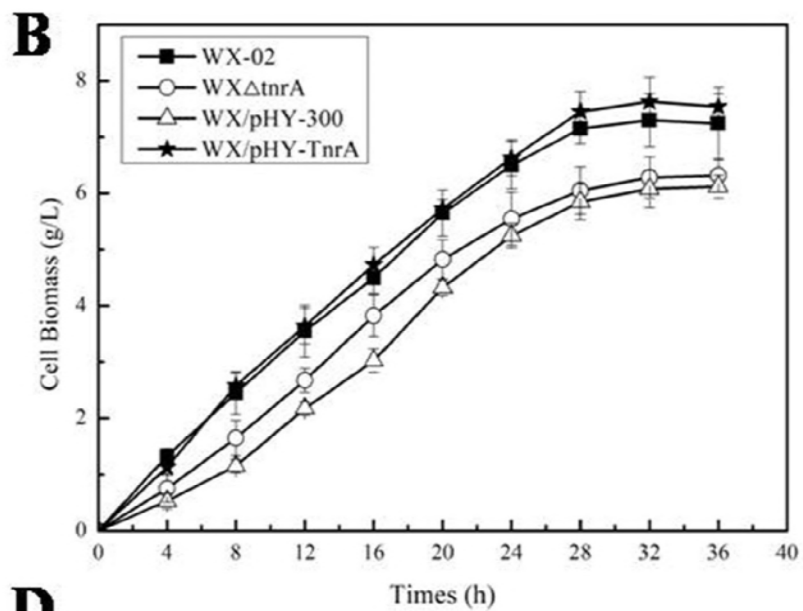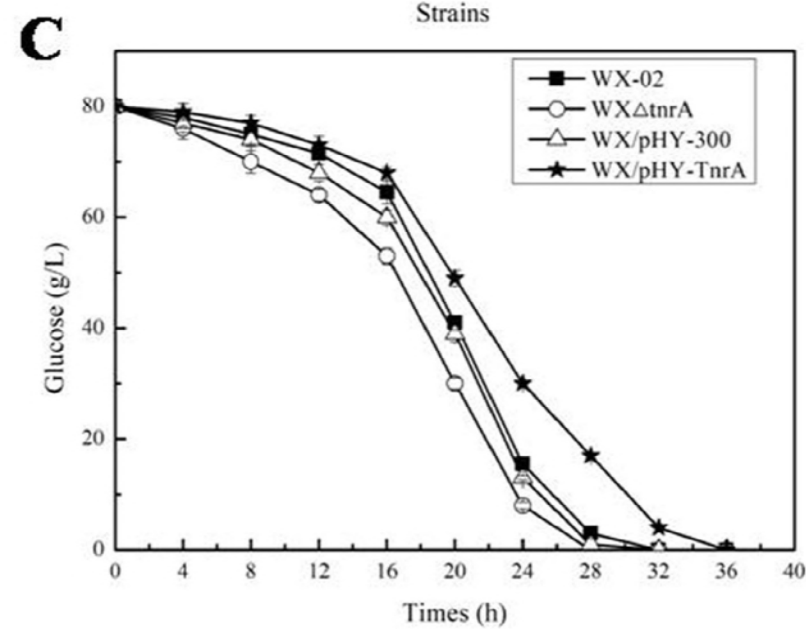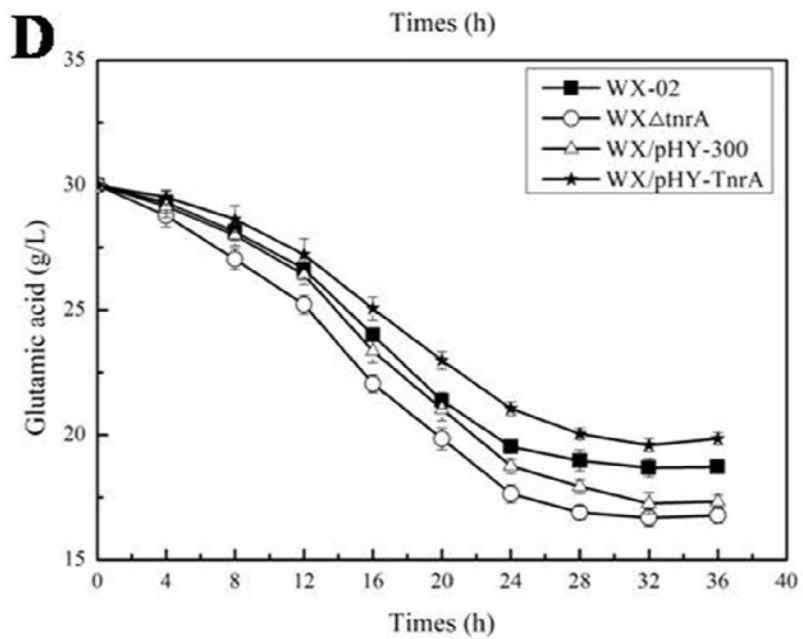

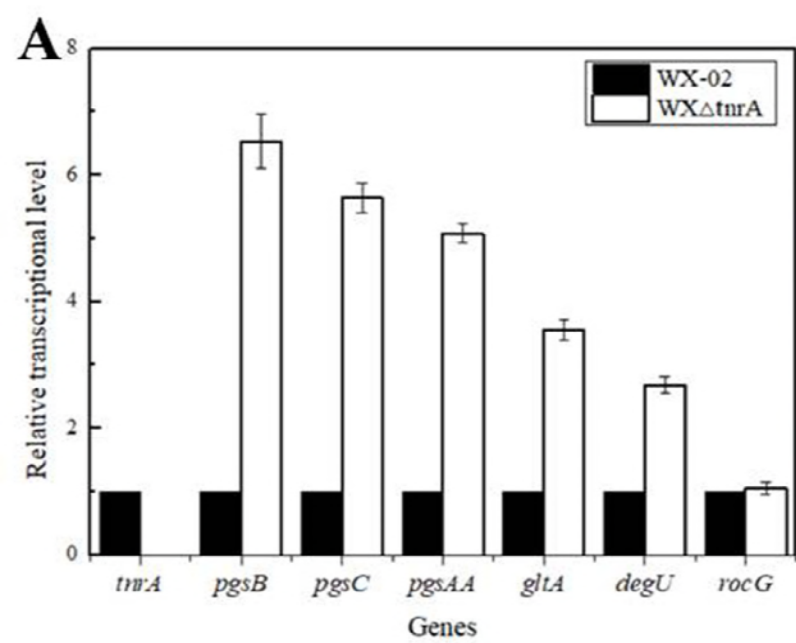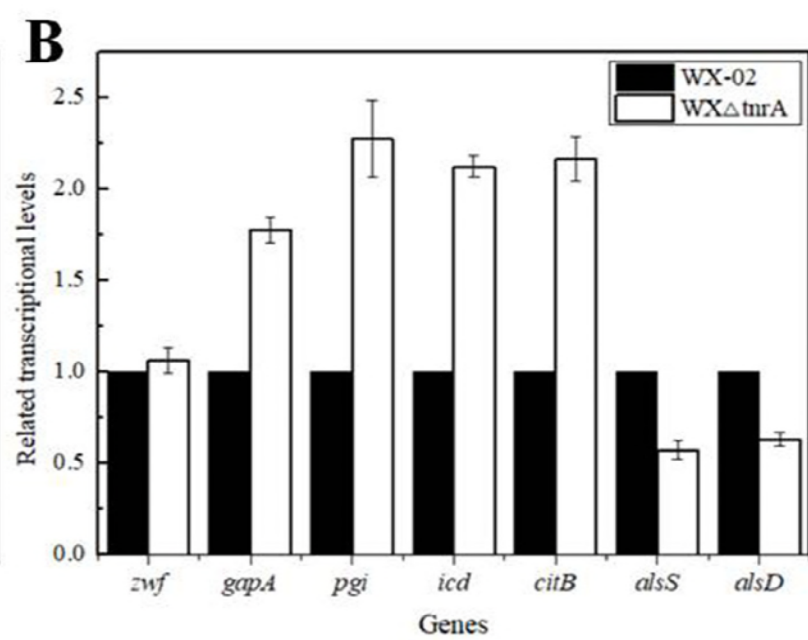

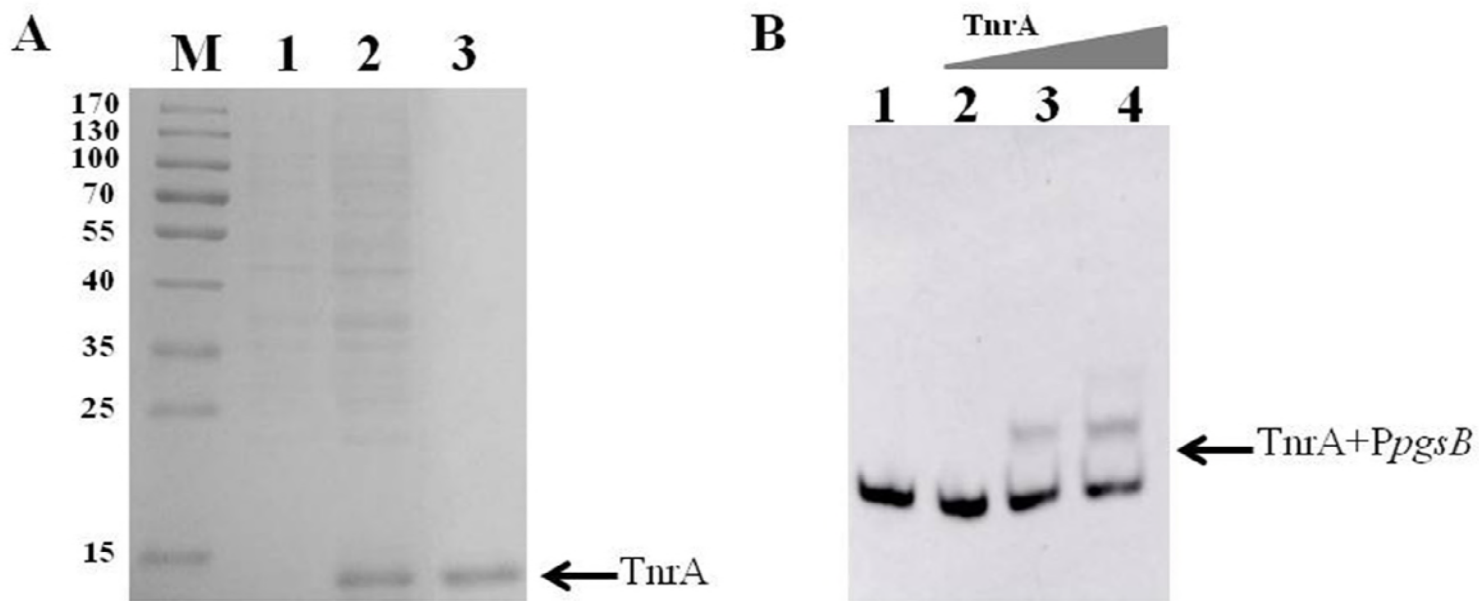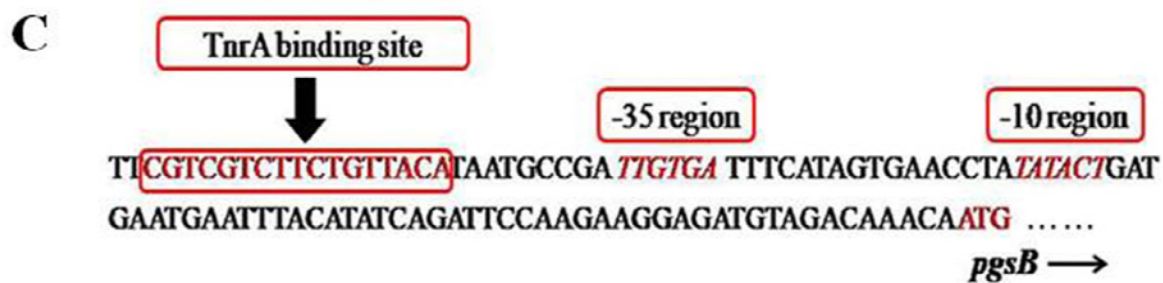



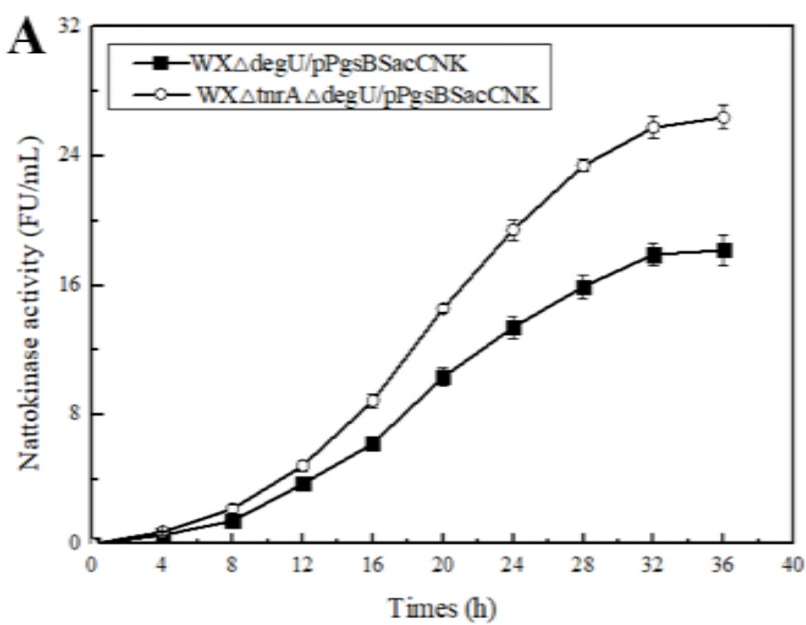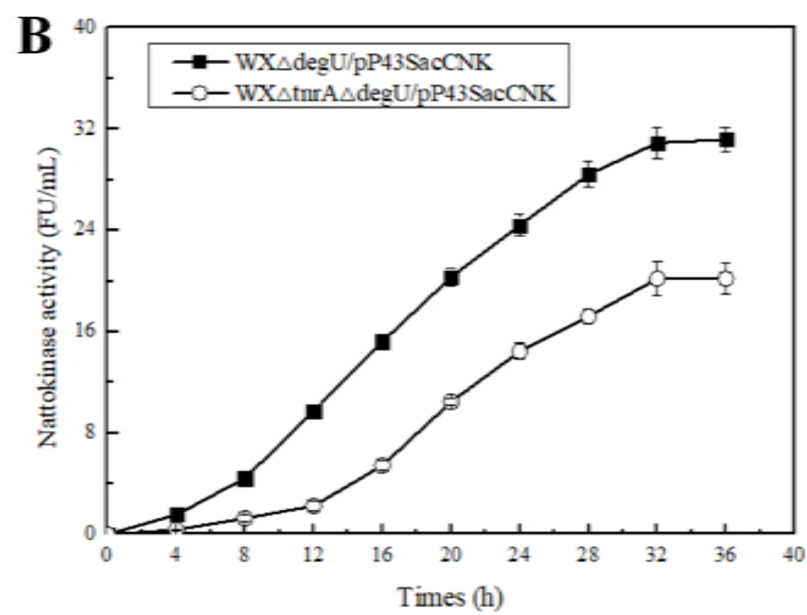

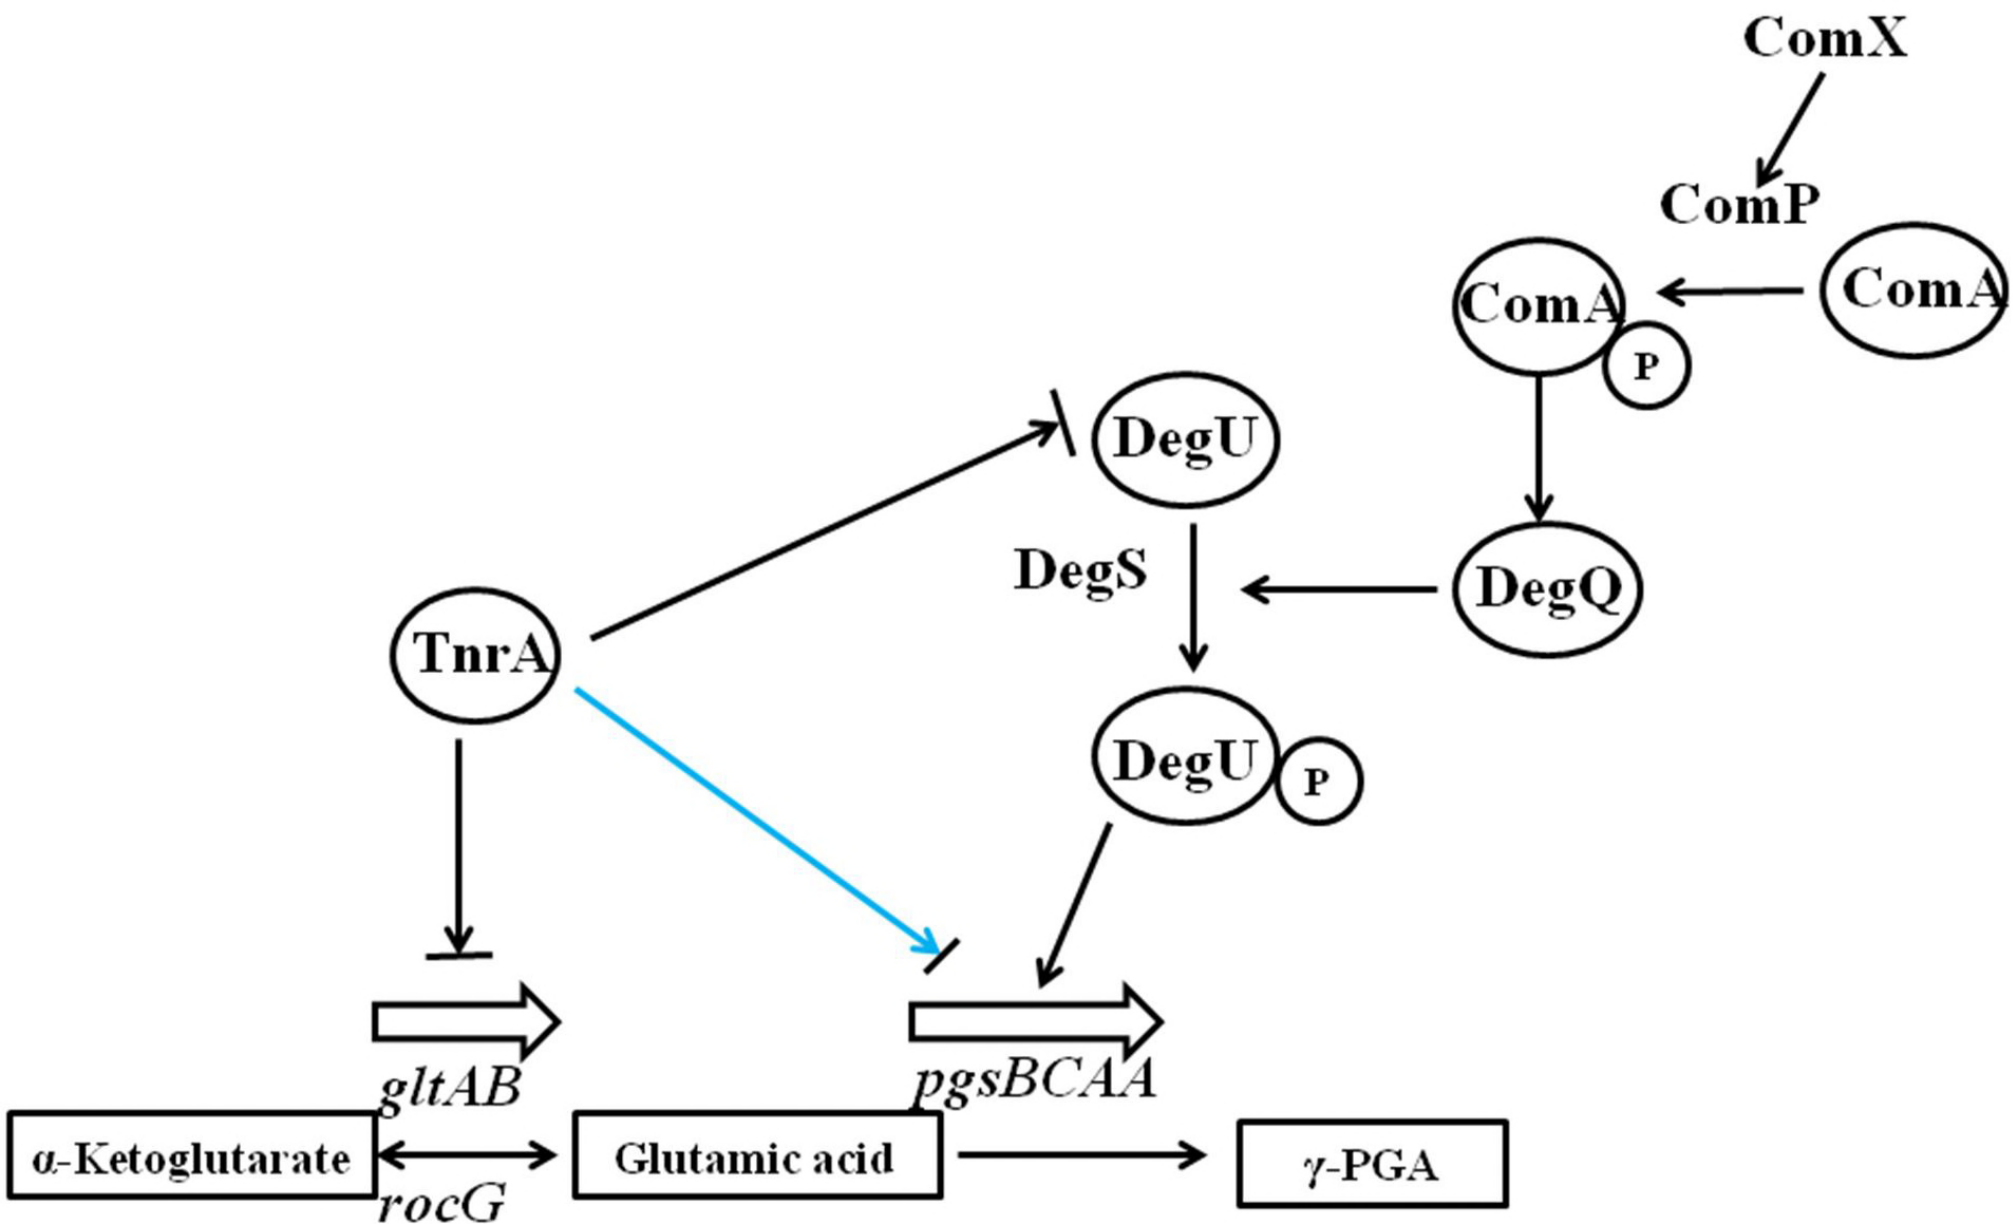

Source: https://www.biorxiv.org/content/10.1101/294728v1.full.pdf
